# Supplementary material
Source: MDPI journal article supplement (https://www.mdpi.com/2075-4701/10/1/144)

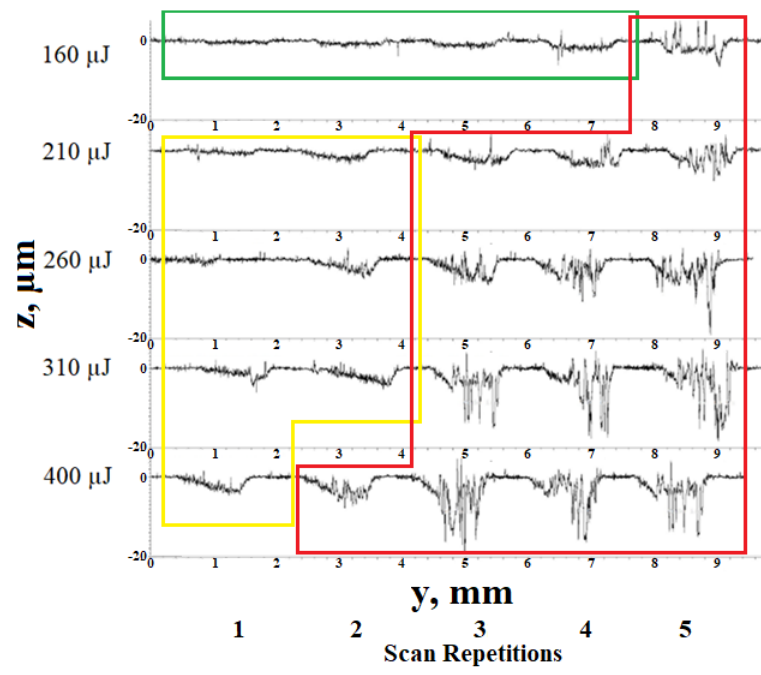

**Figure S1.** Profiles of laser treated areas.

Supplement: s1 [file s1]
